# Supplementary material
Source: PubMed Central journal article supplement (PMC8792073)

## SARS-CoV-2 Spike Trimer, His Tag (B.1.1.529/Omicron) (MALS verified)

|                 |                   |
|-----------------|-------------------|
| <b>Cat. No.</b> | SPN-C52Hz         |
| <b>Lot. No.</b> | 5714a-21C6F1-21C6 |
| <b>Size</b>     | 50 ug             |

### Description

**Source** SARS-CoV-2 Spike Trimer, His Tag (B.1.1.529/Omicron) (SPN-C52Hz) is the ectodomain of SARS-CoV-2 spike protein which contains AA Val 16 - Pro 1213 (Accession # QHD43416.1 (A67V, HV69-70del, T95I, G142D, VYY143-145del, N211del, L212I, ins214EPE, G339D, S371L, S373P, S375F, K417N, N440K, G446S, S477N, T478K, E484A, Q493R, G496S, Q498R, N501Y, Y505H, T547K, D614G, H655Y, N679K, P681H, N764K, D796Y, N856K, Q954H, N969K, L981F)). The 35 spike mutations are identified on the SARS-CoV-2 Omicron variant (Pango lineage: B.1.1.529; GISAID clade: GR/484A; Nextstrain clade: 21K). The recombinant protein is expressed from human 293 cells (HEK293) with T4 fibrin trimerization motif and a polyhistidine tag at the C-terminus. Proline substitutions (F817P, A892P, A899P, A942P, K986P, V987P) and alanine substitutions (R683A and R685A) are introduced to stabilize the trimeric prefusion state of SARS-CoV-2 S protein and abolish the furin cleavage site, respectively. Predicted N-terminus: Val 16

**Molecular Characterization** This protein carries a polyhistidine tag at the C-terminus. The protein has a calculated MW of 138.2 kDa. The protein migrates as 170-200 kDa under reducing (R) condition (SDS-PAGE) due to glycosylation.

### Specifications

**Physical Appearance** Colorless transparent liquid.

**Protein Content** Verified by UV280, SDS-PAGE, BCA and / or Bradford.

**Endotoxin** Less than 1.0 EU per µg by the LAL method.

**Purity** >95% as determined by SDS-PAGE.  
96.89% as determined by HP-SEC, and 584.30 kDa verified by MALS.

**Bioactivity** Measured by its binding ability in a functional ELISA. Immobilized SARS-CoV-2 Spike Trimer, His Tag (B.1.1.529/Omicron) (Cat. No. SPN-C52Hz) at 1 µg/mL (100 µL/well) can bind Human ACE2, Fc Tag (Cat. No. AC2-H5257) with a linear range of 0.4-13 ng/mL (QC tested).

**Formulation** Delivered as bulk protein in a 0.2 µm filtered solution of PBS with 10% trehalose as protectant. The final concentration of SARS-CoV-2 Spike Trimer, His Tag (B.1.1.529/Omicron) (MALS verified) is 730 µg/ml, with a total volume of 69 µL.

### Instruction

It is strongly recommended to centrifuge at 1000 rpm for 15s before opening the cap.

Avoid vigorous shaking or vortexing.

### Minimal volume for aliquot

To avoid surface adsorption loss and inactivation, the protein must **NOT** be aliquoted to less than 10 µg per vial.

**Under the following conditions**, Carrier protein (0.1% (W/V) BSA or HSA) **MUST** be included in reconstitution buffer.

1. Aliquots of less than 10 µg/vial;
2. The concentration is less than the protein concentration published on the COA;
3. Long term storage.

### SDS-PAGE

SARS-CoV-2 Spike Trimer, His Tag (B.1.1.529/Omicron) on SDS-PAGE under reducing (R) condition. The gel was stained overnight with Coomassie Blue. The purity of the protein is greater than 95%.

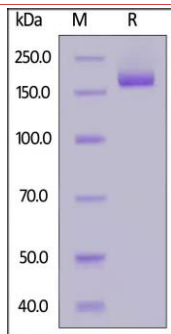

### Storage

**Avoid repeated freeze-thaw cycles.**

The product **MUST** be stored at -70°C or lower upon receipt.

The product is validated to be stable after storage at -70°C for 3 months under sterile conditions.

### Contact Information:

+1 800-810-0816 (North America)  
+86 400-682-2521 (Asia Pacific)  
+86 400-682-2521 (China)

Updated by Amy Cui

Dec,14,2021

This document has been electronically produced and is valid without a signature

For further assistance, please contact our technical support team at: [TechSupport@acrobiosystems.com](mailto:TechSupport@acrobiosystems.com)

Please visit [www.acrobiosystems.com/A655.html](http://www.acrobiosystems.com/A655.html) for e-copy of this certificate of analysis.

Scan for E-copy of CoA

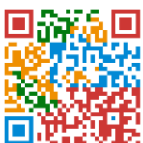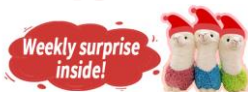

► Most updated protocol  
► Technical notes

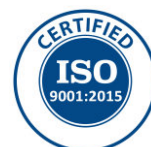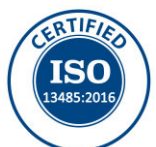

Supplement: mmc2.pdf [file mmc2.pdf]
